## Case simulations for permanent education in Primary Care – School of Patients DF

Estevo Cubas-Rolim

*E Cubas-Rolim<sup>1,2,3</sup>, FR Yung<sup>2</sup>, MR Gripp<sup>2</sup>, CLA Oliveira<sup>2</sup>, LA Marques<sup>2</sup>, MC Fagundes<sup>2</sup>, BV Souza<sup>2</sup>, L Ribeiro<sup>2</sup>, E Faria-Tostes<sup>2</sup>, F Santana<sup>1</sup>*

<sup>1</sup>Secretaria De Saude - Distrito Federal, Brasilia, Brazil

<sup>2</sup>Universidade De Brasilia, Brasilia, Brazil

<sup>3</sup>Universidade Euro-Americana, Brasilia, Brazil

Contact: estevaocubasr@gmail.com

### Background:

In scenarios of vulnerability that include triple charge of diseases, permanent education in Primary Care and university is fundamental to allow greater access, efficiency and safety for users and health teams.

### Objectives:

The School of Patients DF was created as a tool for popular and technical health education, including case simulations for practice. It consists of standard technical content (Chapters), categorized by conditions and diseases, shared by Google Drive and used primarily in selected primary care units of Brazil's capital city.

### Results:

Technical simulations are performed in pairs, 1 participant acts as “patient” with script in hand (topics of the training) while the other acts as “health professional” as if in a regular visit. Simulations are timed for 10 minutes for consultation and 5 for feedback, boosting learning. Contents are based on guidelines and protocols from the Ministry of Health, Secretary of Health and Brazilian Community and Family Medicine Society. Since 2016 there have been realized over 1400 simulations, including weekly classes for last term medical students at the capital city federal university.

### Conclusions:

Simulations optimize the time necessary for permanent education (15 minutes blocks), avoiding limiting access for triage and consults, allowing smaller groups to train with greater focus and independent of computers or projectors.

### Key messages:

- Standardizing training and practice bring benefit to patient care and safety.
- Simulations with structured physical examination are important both for professional as well as students.
